# Supplementary material for: Maternal sleep deprivation disrupts glutamate metabolism in offspring rats
Source: PubMed Central journal article supplement — Zool Res. 2024 Nov 18;45(6):1221–31. doi: 10.24272/j.issn.2095-8137.2024.250 (PMC11668958; doi:10.24272/j.issn.2095-8137.2024.250), 2024-11-18
Supplement: zr-45-1221-S1.pdf [file zr-45-1221-S1.pdf]

## **Supplementary Materials**

### **Maternal sleep deprivation disrupts glutamate metabolism in offspring rats**

Wen-Ting He<sup>1</sup>, Dong-Xu Li<sup>1</sup>, Jin-Hua Fan<sup>1</sup>, Zheng-Yu Yao<sup>1</sup>, Yu-Peng Cun<sup>1</sup>, Zhi-Fang Dong<sup>1,\*</sup>

<sup>1</sup>Growth, Development, and Mental Health of Children and Adolescence Center, Pediatric Research Institute, Ministry of Education Key Laboratory of Child Development and Disorders, National Clinical Research Center for Child Health and Disorders, Chongqing Key Laboratory of Child Neurodevelopment and Cognitive Disorders, Children's Hospital of Chongqing Medical University, Chongqing 400014, China

\*Corresponding author, E-mail: [zfdong@cqmu.edu.cn](mailto:zfdong@cqmu.edu.cn)





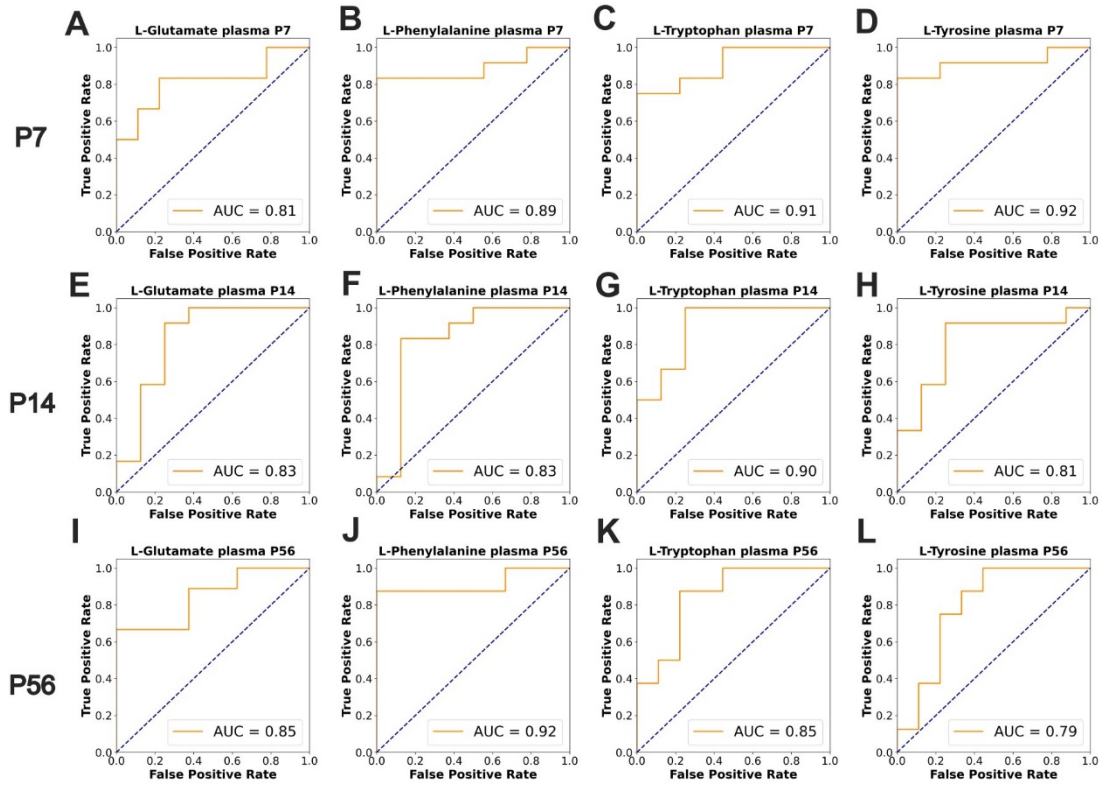

**Supplementary Figure S3** The ROC curve of plasma metabolites in MSD offspring. A-D: ROC curve of L-glutamate (A), L-tryptophan (B), L-tyrosine (C), L-phenylalanine (D) at P7; E-H: ROC curve of L-glutamate (E), L-tryptophan (F), L-tyrosine (G), L-phenylalanine (H) at P14; I-L: ROC curve of L-glutamate (I), L-tryptophan (J), L-tyrosine (K), L-phenylalanine (L) at P56.

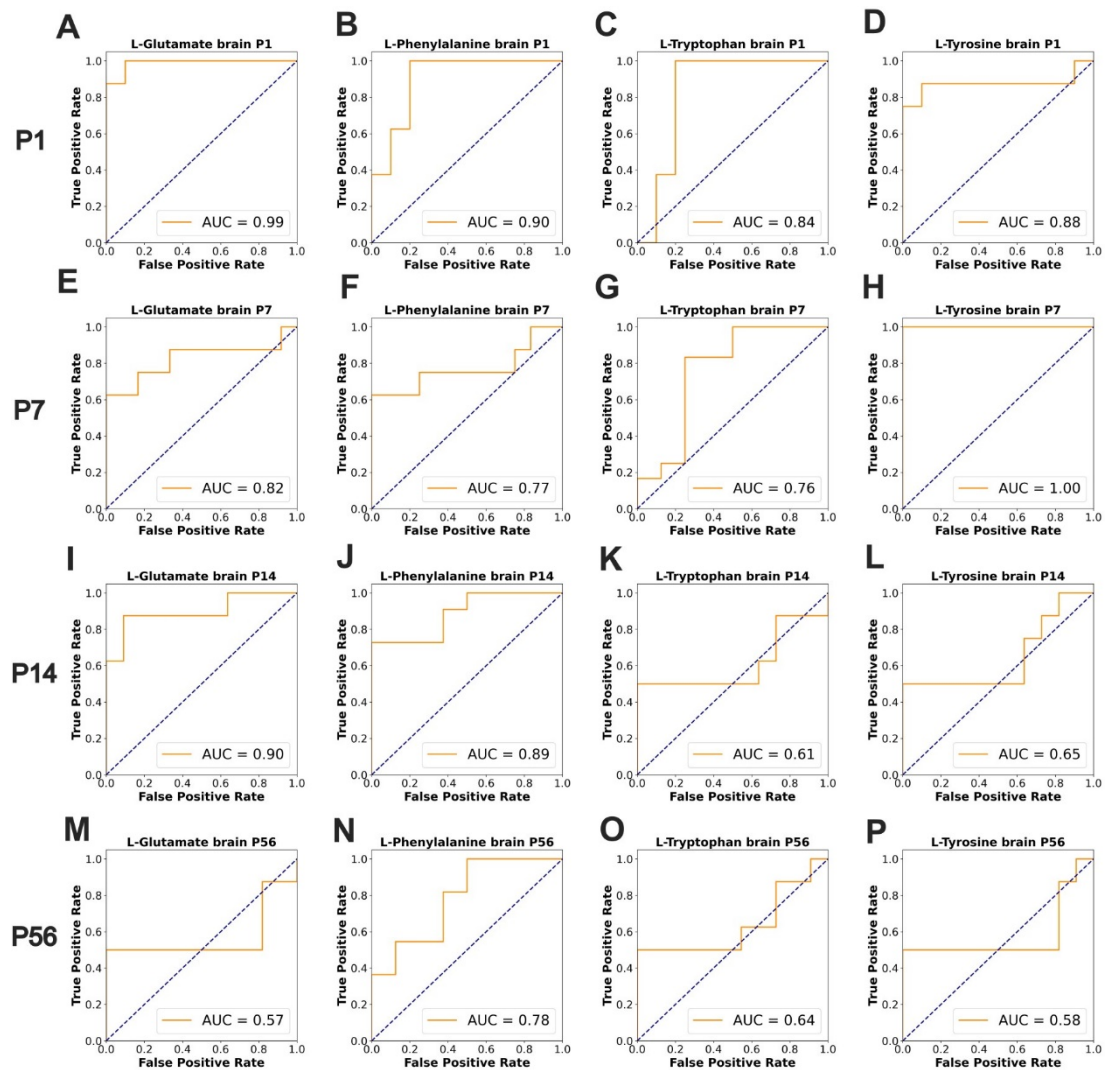

**Supplementary Figure S4** The ROC curve of brain metabolites in MSD offspring. A-D: ROC curve of L-glutamate (A), L-tryptophan (B), L-tyrosine (C), L-phenylalanine (D) at P1; E-H: ROC curve of L-glutamate (E), L-tryptophan (F), L-tyrosine (G), L-phenylalanine (H) at P7; I-L: ROC curve of L-glutamate (I), L-tryptophan (J), L-tyrosine (K), L-phenylalanine (L) at P14; M-P: ROC curve of L-glutamate (M), L-tryptophan (N), L-tyrosine (O), L-phenylalanine (P) at P56.

**Supplementary Table S1 The identified 26 metabolites in the brain that consistently showed alterations across three developmental stages (P < 0.05).**

| compound.name                        | P7       |          |          | P14      |          |          | P56      |          |          |
|--------------------------------------|----------|----------|----------|----------|----------|----------|----------|----------|----------|
|                                      | P value  | t        | logFC    | P value  | t        | logFC    | P value  | t        | logFC    |
| 3-(4-Hydroxyphenyl)lactate           | 0.02563  | -2.35134 | -0.21315 | 0.009812 | -2.93164 | -2.43446 | 0.020944 | 2.620879 | 1.050587 |
| 3,6-Dihyronicotinic acid             | 0.004845 | -3.22118 | -0.76458 | 0.000154 | -4.84536 | -6.79811 | 0.032718 | -2.39603 | -2.81111 |
| 3'-AMP                               | 0.027087 | -2.39396 | -0.34954 | 0.014657 | -2.74376 | -5.98428 | 0.004656 | -3.38319 | -16.2196 |
| 5-Oxoproline                         | 0.001925 | -3.63535 | -0.88913 | 0.001662 | -3.7541  | -14.8424 | 0.004957 | 3.347142 | 1.791909 |
| beta-Alanyl-N(pi)-methyl-L-histidine | 0.010476 | -2.74428 | -0.23745 | 0.002499 | -3.48116 | -0.59751 | 0.041901 | 2.239208 | 0.423776 |
| Betaine                              | 4.69E-05 | -5.32659 | -11.5717 | 0.017262 | -2.66557 | -50.2744 | 0.001668 | 3.821127 | 0.579924 |
| Creatine                             | 0.001628 | -3.72439 | -1.52469 | 0.008532 | -2.98718 | -1.20106 | 0.012932 | 2.850944 | 0.672861 |
| Cytidine                             | 0.006095 | -3.13689 | -3.74791 | 0.005999 | -3.16108 | -2.50528 | 0.046453 | 2.189749 | 0.459792 |
| Deoxycytidine                        | 0.00981  | -2.91078 | -1.06661 | 0.001328 | -3.85667 | -40.1052 | 0.001655 | 3.894537 | 3.033066 |
| Ergothioneine                        | 0.005296 | -3.17989 | -0.73555 | 0.0302   | -2.31613 | -0.34981 | 0.017585 | -2.60592 | -0.26786 |
| Hexadecanoic acid                    | 0.00099  | 3.95336  | 4.756095 | 0.007302 | 3.072452 | 5.208667 | 0.014159 | 2.826968 | 9.806024 |
| IMP                                  | 8.09E-06 | -6.13063 | -1.96704 | 3.13E-05 | -5.57062 | -2.09138 | 0.001906 | -3.82681 | -14.8541 |
| L-Arginine                           | 0.041742 | -2.00939 | -0.12726 | 0.00707  | -3.08824 | -40.6742 | 0.032107 | 2.111239 | 0.128016 |
| L-Carnitine                          | 0.009264 | -2.94526 | -72.1896 | 0.002361 | -3.59399 | -105.761 | 0.03948  | -2.29777 | -60.1883 |
| L-Glutamate                          | 0.036369 | -2.27636 | -0.56075 | 0.002342 | -3.58824 | -1.86795 | 0.020454 | -2.63896 | -2.79563 |
| L-Histidine                          | 0.002228 | -3.59185 | -7.59756 | 0.002138 | -3.63918 | -26.7594 | 0.000626 | 4.384152 | 4.519362 |
| L-Kynurenine                         | 0.000411 | -4.23778 | -0.51511 | 0.005857 | -2.94236 | -0.29426 | 0.010475 | 2.555195 | 0.144683 |
| L-Phenylalanine                      | 0.011231 | -2.85537 | -4.62248 | 0.007161 | -3.08213 | -10.6034 | 0.005297 | 3.318928 | 8.774903 |
| L-Tryptophan                         | 0.000224 | -4.6179  | -28.9186 | 0.001721 | -3.73841 | -18.1101 | 0.018339 | 2.695261 | 4.213427 |
| L-Tyrosine                           | 0.015407 | -2.70709 | -7.40992 | 0.024077 | -2.50358 | -11.4554 | 0.039116 | 2.30241  | 4.342356 |
| N(pi)-Methyl-L-histidine             | 0.007766 | -3.02579 | -3.36457 | 0.011511 | -2.85837 | -4.37199 | 0.023175 | 2.57551  | 4.88066  |
| NG,NG-Dimethyl-L-arginine            | 0.016824 | -2.66481 | -3.21966 | 0.014557 | -2.74733 | -10.9581 | 0.032918 | 2.39329  | 4.569581 |
| Pantothenate                         | 1.28E-06 | -6.26947 | -0.36737 | 0.010802 | -2.88928 | -30.207  | 0.006374 | 3.227034 | 12.75989 |
| Phenethylamine                       | 0.004893 | -3.1975  | -0.54856 | 0.00334  | -3.43501 | -35.4519 | 0.000603 | -4.33162 | -0.69545 |
| Prostaglandin F2alpha                | 0.045294 | 2.179081 | 3.637205 | 0.000882 | 4.042942 | 9.99285  | 0.046284 | 2.098718 | 0.192542 |
| Stearidonic acid                     | 0.010222 | 2.89896  | 3.799684 | 0.029979 | 2.394754 | 4.525085 | 0.049642 | 1.764466 | 0.087802 |

**Supplementary Table S2 The identified 36 metabolites in the brain that consistently showed alterations across all developmental stages (P < 0.05).**

| Compound name                      | P1       |          |          | p7       |          |          | p14      |          |          | p56      |          |          |
|------------------------------------|----------|----------|----------|----------|----------|----------|----------|----------|----------|----------|----------|----------|
|                                    | P value  | t        | logFC    |
| 5-L-Glutamyl-taurine               | 0.485203 | 0.71405  | 0.98182  | 0.007896 | -2.9782  | -22.8195 | 0.005573 | 3.159396 | 31.22529 | 0.019915 | 2.562526 | 15.40993 |
| 5'-Oxoinosine                      | 0.002014 | -3.66379 | -0.39532 | 0.016833 | -2.62765 | -0.28459 | 0.153772 | -1.49101 | -0.28051 | 0.151999 | -1.4981  | -0.23196 |
| Adenosine                          | 0.038243 | -2.25282 | -13.3101 | 8.02E-05 | -5.03266 | -35.7494 | 0.007835 | 3.001861 | 12.12715 | 0.004743 | -3.23518 | -3246.06 |
| CDP-ethanolamine                   | 0.004325 | 3.30617  | 2.409943 | 1.08E-07 | 8.35767  | 0.396213 | 0.002313 | 3.561607 | 8.119759 | 0.018279 | 2.603731 | 11.3983  |
| Choline phosphate                  | 0.153278 | 1.4972   | 0.051243 | 0.011321 | 2.812696 | 177.5538 | 0.005657 | 3.152488 | 3706.369 | 0.01721  | 2.632605 | 2546.744 |
| Cys-Gly                            | 0.009877 | 2.916072 | 0.526975 | 0.014002 | 2.713972 | 1.997941 | 0.054549 | 2.060448 | 0.600903 | 0.00445  | -3.26454 | -13.5181 |
| Cystathionine                      | 0.000634 | 4.20599  | 1.218144 | 6.98E-06 | 6.178933 | 0.545586 | 0.009235 | 2.925329 | 109.9987 | 0.011746 | 2.813881 | 168.3329 |
| Cytosine                           | 0.036104 | -2.28201 | -0.3148  | 0.021108 | -2.52046 | -9.65468 | 0.024076 | -2.46976 | -12.3773 | 0.006893 | -3.06271 | -8.24487 |
| Deoxyinosine                       | 0.003456 | -3.41137 | -0.99412 | 0.304183 | 1.056905 | 0.56497  | 0.000245 | -4.58738 | -2.72038 | 0.001879 | -3.6585  | -1.53601 |
| D-Fructose 6-phosphate             | 0.030059 | -2.37421 | -0.19126 | 0.027608 | -2.39146 | -0.19627 | 0.258748 | 1.167319 | 0.210846 | 0.244233 | 1.205206 | 0.194453 |
| Ethanolamine phosphate             | 5.49E-06 | 6.581909 | 35.06695 | 1.61E-06 | 6.909222 | 29.63597 | 0.005939 | 3.13001  | 652.2745 | 0.025331 | 2.445826 | 29.40045 |
| gamma-Glutamyl-beta-cyanoalanine   | 0.001446 | 3.81861  | 1.181188 | 0.00817  | 2.962659 | 0.585717 | 0.008682 | 2.954105 | 333.6659 | 0.021209 | 2.532123 | 150.6089 |
| gamma-L-Glutamyl-L-cysteine        | 0.00044  | 4.378338 | 1.747025 | 0.2864   | 1.097793 | 1.020431 | 0.022077 | -2.51182 | -3.0453  | 0.019526 | -2.57201 | -23.0493 |
| Glutathione                        | 0.235078 | 1.232515 | 5.586009 | 0.015283 | 2.673032 | 29.64958 | 0.048822 | -2.11751 | -148.915 | 0.003172 | -3.4196  | -12.4541 |
| Hypoxanthine                       | 0.007237 | 3.063734 | 3.469607 | 0.044304 | -2.1582  | -68.2668 | 0.009666 | -2.90405 | -1286.95 | 0.009096 | -2.93373 | -1259.49 |
| IMP                                | 0.00083  | -4.07906 | -3963.66 | 0.003877 | -3.29987 | -629.944 | 0.002585 | -3.51091 | -75.0657 | 0.031403 | -2.34019 | -0.93933 |
| Inosine                            | 2.68E-06 | -6.97465 | -1642.07 | 2.79E-07 | -7.8291  | -2067.95 | 0.004217 | -3.28745 | -126.043 | 0.001188 | -3.86739 | -111.5   |
| L-4-Hydroxyphenylglycyl-L-arginine | 0.016054 | 2.682704 | 0.463663 | 0.031564 | -2.32625 | -0.51283 | 0.120261 | -1.63336 | -0.41569 | 0.370244 | 0.919779 | 0.137496 |
| L-Aroenate                         | 4.00E-05 | 5.545937 | 7.08649  | 0.000894 | 3.9529   | 8.486452 | 0.037227 | -2.25476 | -5.33219 | 0.005396 | 3.175826 | 1.989002 |
| L-Citrulline                       | 0.000303 | 4.555897 | 3.513209 | 0.000305 | 4.430541 | 3.002926 | 0.020866 | 2.539092 | 52.1185  | 0.012804 | 2.773172 | 123.4615 |
| L-Glutamate                        | 1.10E-06 | 7.479437 | 262.1437 | 0.024275 | 2.45356  | 55.76695 | 0.005363 | 3.177014 | 1190.083 | 0.025395 | 2.444603 | 821.9884 |
| L-Mimosine                         | 0.003144 | -3.45562 | -1.16225 | 4.63E-06 | -6.37935 | -1.60027 | 0.007546 | 3.019313 | 9.026436 | 0.016375 | 2.656372 | 11.2943  |
| L-Phenylalanine                    | 0.000819 | 4.085151 | 62.52109 | 0.00626  | 3.083847 | 0.461639 | 0.006744 | -3.07134 | -42.7484 | 0.020727 | -2.54323 | -17.6847 |
| L-Pipecolate                       | 0.001449 | 3.817837 | 3.048756 | 0.038549 | 2.227717 | 0.128102 | 0.011259 | 2.83256  | 3.534177 | 0.010775 | 2.854446 | 4.935534 |
| L-Tryptophan                       | 0.055327 | 2.062382 | 49.04349 | 0.038843 | -2.22394 | -11.1307 | 0.008407 | 2.969081 | 26.03088 | 0.015376 | 2.6864   | 741.7931 |
| L-Tyrosine                         | 0.002122 | 3.639538 | 49.11239 | 2.55E-06 | -6.67616 | -45.7181 | 0.007323 | 3.033179 | 77.318   | 0.007959 | 2.995961 | 118.6154 |
| myo-Inositol                       | 0.000504 | -4.31401 | -2.07903 | 0.008475 | -2.94587 | -24.2089 | 0.028098 | -2.39425 | -16.489  | 0.026316 | -2.42718 | -0.78217 |
| N-Acetyl-L-aspartate               | 0.002669 | 3.532241 | 454.5641 | 0.000888 | -3.95558 | -442.099 | 0.005298 | 3.18269  | 507.0297 | 0.009542 | 2.911387 | 430.5971 |

|                                        |          |          |          |          |          |          |          |          |          |          |          |          |
|----------------------------------------|----------|----------|----------|----------|----------|----------|----------|----------|----------|----------|----------|----------|
| S-(L-Histidin-5-yl)-L-cysteine S-oxide | 2.77E-05 | 5.732528 | 2.960318 | 0.000233 | -4.55103 | -11.377  | 0.014054 | 2.728003 | 12.72649 | 7.87E-05 | -5.12233 | -3.67646 |
| S-Adenosyl-L-homocysteine              | 0.281583 | 1.113293 | 0.625961 | 0.000907 | -3.94643 | -2.05531 | 0.012112 | 2.798223 | 30.59979 | 0.01378  | 2.738429 | 3.820118 |
| S-Adenosyl-L-methionine                | 0.178856 | 1.404193 | 15.38328 | 3.44E-05 | -5.42234 | -4.18968 | 0.001014 | -3.93647 | -5.64249 | 0.01145  | -2.82589 | -35.2931 |
| sn-Glycero-3-phosphoethanolamine       | 1.81E-12 | 18.5744  | 23.33371 | 1.88E-09 | 10.85453 | 15.36954 | 0.010316 | 2.873598 | 8.420765 | 0.10869  | 1.69074  | 0.30695  |
| Thiamin monophosphate                  | 6.25E-07 | -7.81321 | -1.79389 | 0.007682 | -2.99077 | -6.33953 | 0.015645 | -2.67709 | -14.2008 | 0.000247 | -4.58692 | -4.42234 |
| UMP                                    | 0.000138 | 4.932507 | 516.5186 | 0.00596  | -3.1061  | -408.78  | 0.019377 | 2.574769 | 115.3493 | 0.113026 | 1.668773 | 0.299336 |
| Uridine                                | 5.41E-05 | 5.395125 | 6.606661 | 1.12E-05 | 5.949743 | 10.01232 | 0.031954 | -2.33082 | -3.48413 | 0.000491 | -4.27069 | -3.63534 |
| Xanthine                               | 0.001607 | -3.76941 | -67.5384 | 0.000135 | -4.79672 | -132.315 | 0.022521 | -2.50218 | -20.9223 | 0.044227 | 2.168511 | 220.358  |



**Supplementary Table S3 Metabolic pathway analysis of MSD offspring at different stages in blood (FDR<0.1)**

| <b>P7</b>                                           | <b>P14</b>                                          | <b>P56</b>                  |
|-----------------------------------------------------|-----------------------------------------------------|-----------------------------|
| Arginine and proline metabolism                     | Aminoacyl-tRNA biosynthesis                         | Aminoacyl-tRNA biosynthesis |
| Aminoacyl-tRNA biosynthesis                         | Arginine biosynthesis                               | Histidine metabolism        |
| D-Glutamine and D-glutamate metabolism              | Histidine metabolism                                | Phenylalanine metabolism    |
| Arginine biosynthesis                               | D-Glutamine and D-glutamate metabolism              |                             |
| Histidine metabolism                                | Arginine and proline metabolism                     |                             |
| Purine metabolism                                   | Glycine, serine and threonine metabolism            |                             |
| Glutathione metabolism                              | Phenylalanine metabolism                            |                             |
| Phenylalanine metabolism                            | Phenylalanine, tyrosine and tryptophan biosynthesis |                             |
| beta-Alanine metabolism                             |                                                     |                             |
| Phenylalanine, tyrosine and tryptophan biosynthesis |                                                     |                             |

**Supplementary Table S4 Metabolic pathway analysis of MSD offspring at different stages in brain (FDR<0.1).**

| <b>P1</b>                                   | <b>P7</b>                                   | <b>P14</b>                                          | <b>P56</b>                                  |
|---------------------------------------------|---------------------------------------------|-----------------------------------------------------|---------------------------------------------|
| Purine metabolism                           | Taurine and hypotaurine metabolism          | Alanine, aspartate and glutamate metabolism         | Alanine, aspartate and glutamate metabolism |
| Alanine, aspartate and glutamate metabolism | Alanine, aspartate and glutamate metabolism | Aminoacyl-tRNA biosynthesis                         | Glutathione metabolism                      |
| Amino sugar and nucleotide sugar metabolism | Arginine biosynthesis                       | Histidine metabolism                                | Arginine biosynthesis                       |
| Glutathione metabolism                      | Purine metabolism                           | Taurine and hypotaurine metabolism                  | Arginine and proline metabolism             |
| Arginine biosynthesis                       | Aminoacyl-tRNA biosynthesis                 | Arginine biosynthesis                               | Aminoacyl-tRNA biosynthesis                 |
| Aminoacyl-tRNA biosynthesis                 | Cysteine and methionine metabolism          | Arginine and proline metabolism                     | Lysine degradation                          |
| Arginine and proline metabolism             | Glutathione metabolism                      | Glycine, serine and threonine metabolism            | Histidine metabolism                        |
| Taurine and hypotaurine metabolism          | Glycine, serine and threonine metabolism    | Cysteine and methionine metabolism                  |                                             |
| Riboflavin metabolism                       | Ascorbate and aldarate metabolism           | Phenylalanine, tyrosine and tryptophan biosynthesis |                                             |
| Ascorbate and aldarate metabolism           | Amino sugar and nucleotide sugar metabolism | Purine metabolism                                   |                                             |
| Histidine metabolism                        | Pyrimidine metabolism                       | Glycerophospholipid metabolism                      |                                             |
| Pyrimidine metabolism                       | Glyoxylate and dicarboxylate metabolism     | Thiamine metabolism                                 |                                             |
| Glyoxylate and dicarboxylate metabolism     | Fructose and mannose metabolism             |                                                     |                                             |
| Thiamine metabolism                         |                                             |                                                     |                                             |
| Cysteine and methionine metabolism          |                                             |                                                     |                                             |
